# Supplementary material for: Guidelines for the diagnosis and management of methylmalonic acidaemia and propionic acidaemia: First revision
Source: PubMed Central journal article supplement — J Inherit Metab Dis. 2021 Mar 9;44(3):566–92. doi: 10.1002/jimd.12370 (PMC8252715; doi:10.1002/jimd.12370), 2021-03-09
Supplement: JIMD-44-566-s001.pdf [file JIMD-44-566-s001.pdf]

# Guidelines for the diagnosis and management of methylmalonic acidaemia and propionic acidaemia: first revision

Patrick Forny *et al.*

Supplemental Material

Supplementary Figure 1

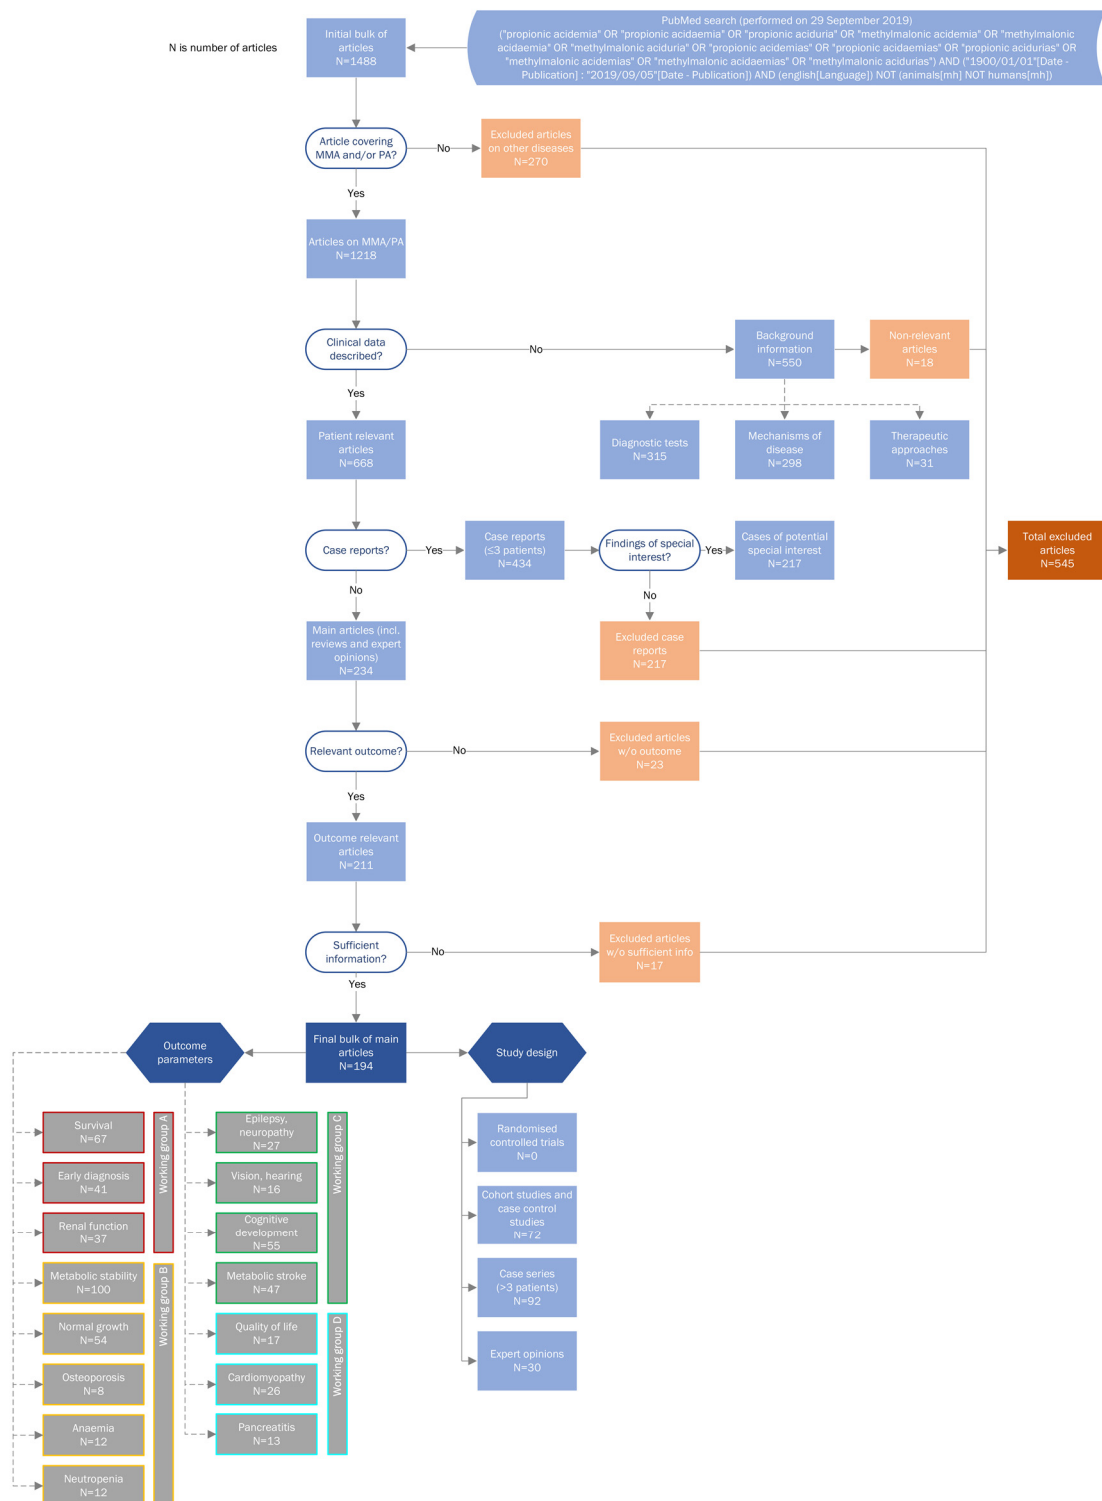

**Supp. Fig. 1.** The flowchart reflects the process of evidence stratification. Articles were filtered according to several criteria and assigned to individual outcome parameters. Some articles are assigned to multiple outcomes.

## Supplementary Figure 2

### A Rating of quality of evidence

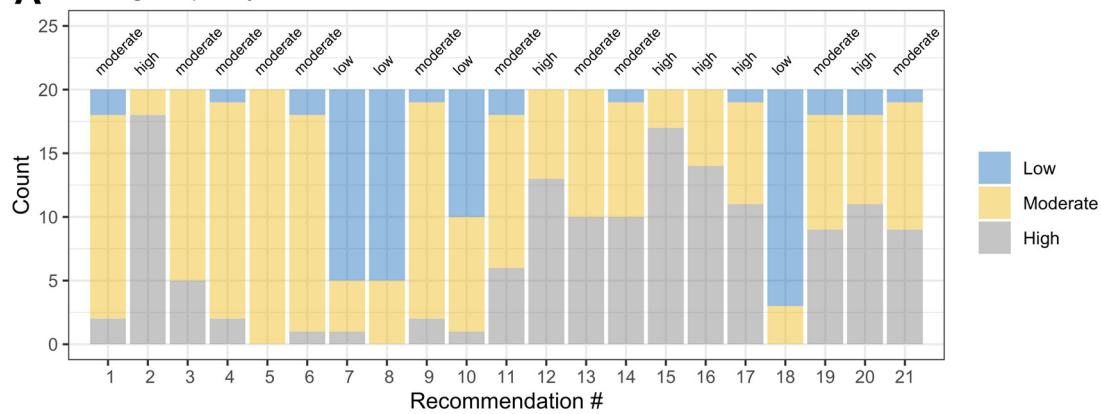

### B Rating of strength of recommendations

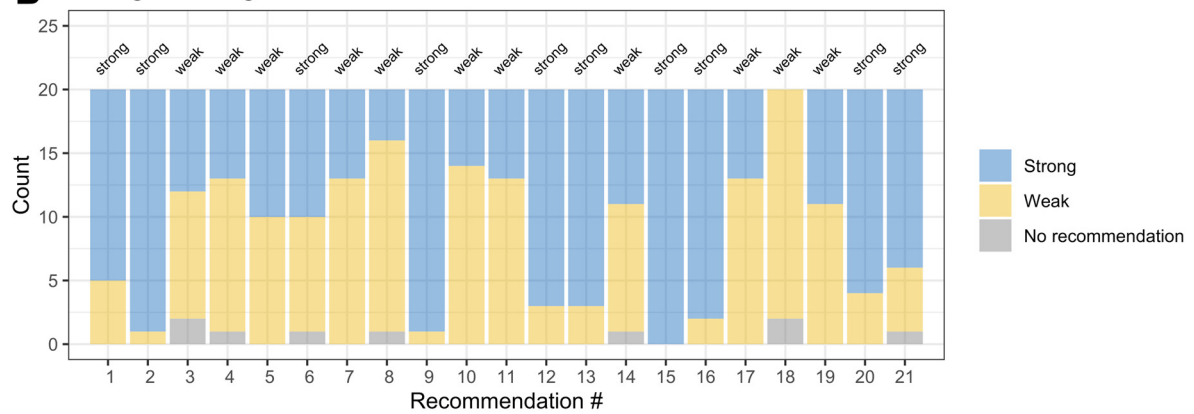

**Supp. Fig. 2.** In (A), the quality of evidence for every recommendation was rated low, moderate, or high by each panellist. The results are depicted in bar charts and the label indicates the overall quality of evidence. In (B), the strengths of every recommendation were rated weak or strong. The labels indicated the overall strength.

### Supplementary Figure 3

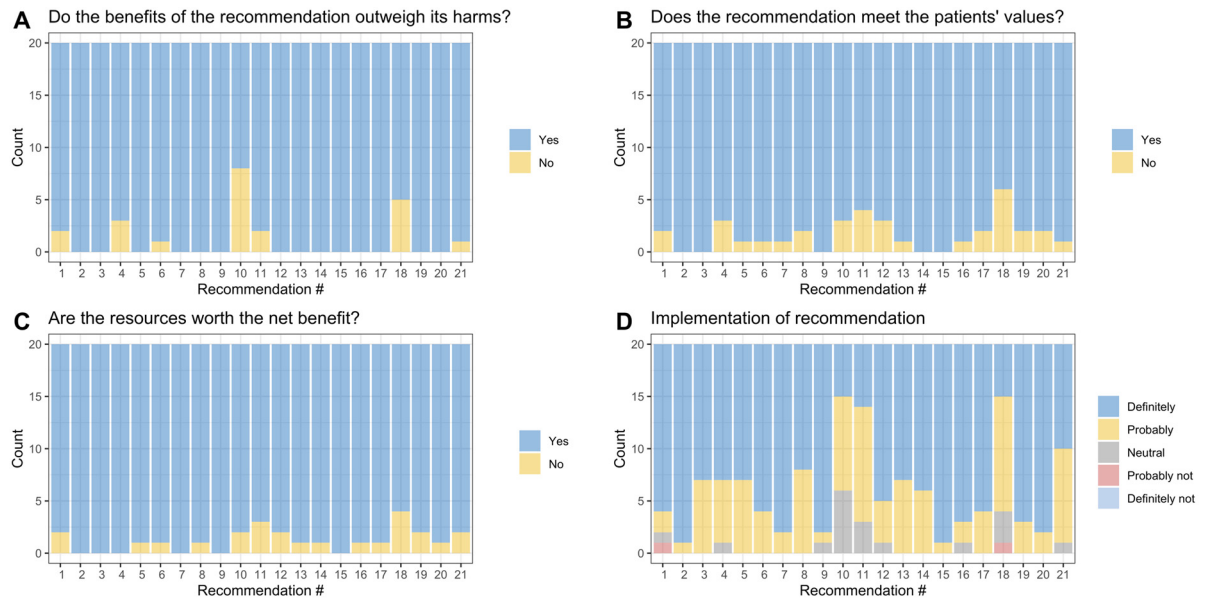

**Supp. Fig. 3.** All the recommendations were evaluated by the panellists according to four (A-D) different questions.

## Supplementary Figure 4

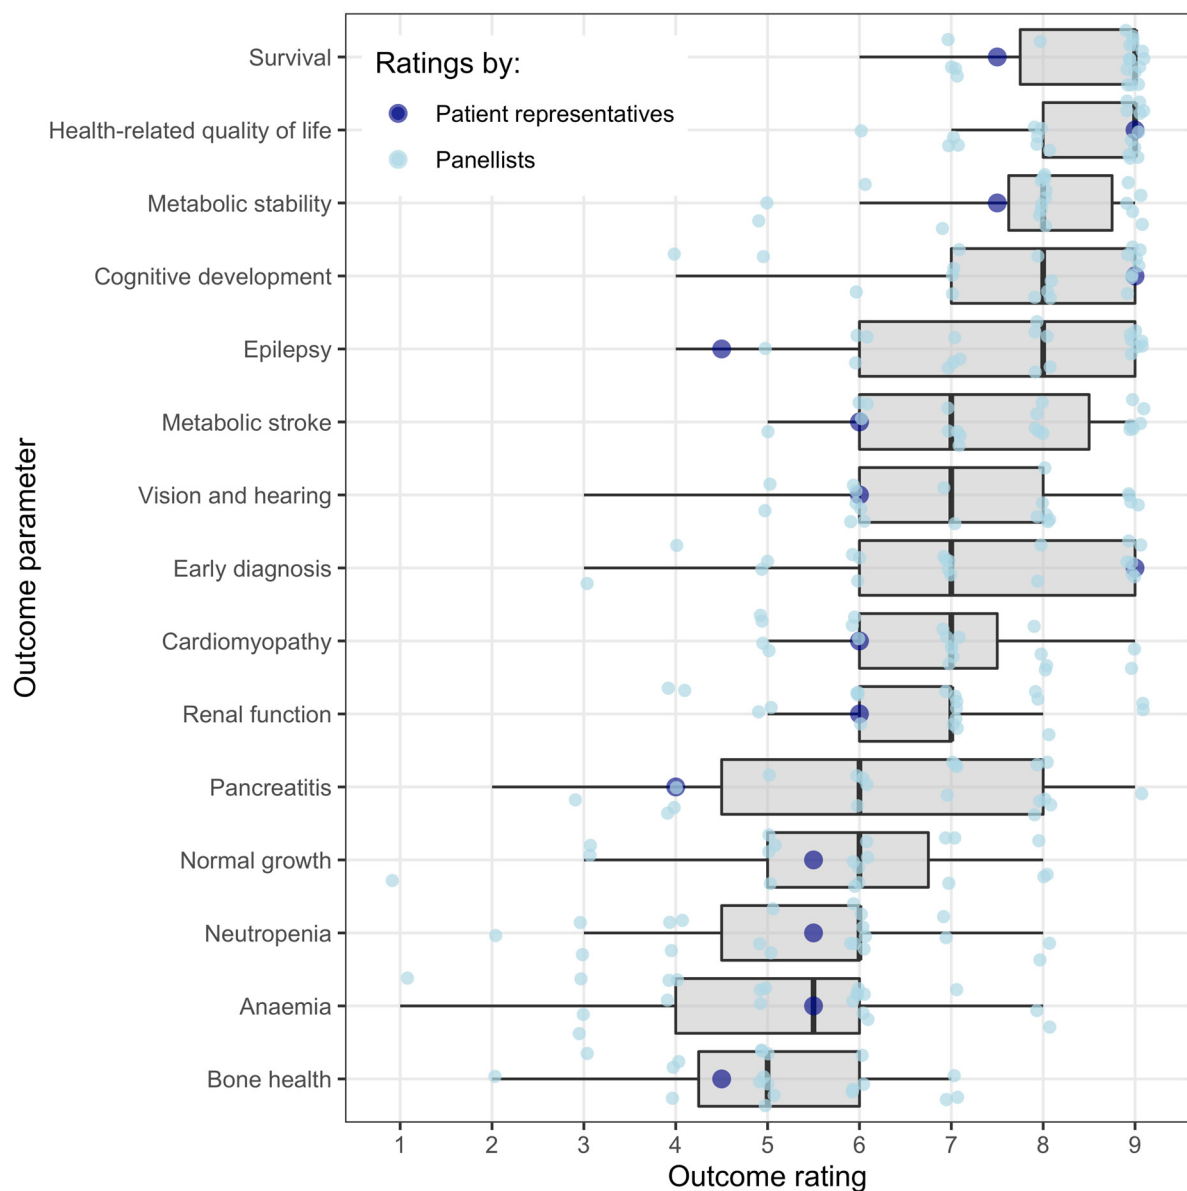

**Supp. Fig. 4.** Outcome parameters are ranked according to their mean values. The boxplots combined with dot plots for individual values illustrate the distribution of the submitted ratings by the panellists and patient representatives. While outcome rankings are discrete values (ranging from 1-9), jitter was added for better visibility of individual data points.
